# Supplementary material for: Cyanooximes as effective and selective co-crystallizing agents
Source: Royal Society of Chemistry journal article supplement (doi:10.1039/b811322j), 2008-10-17
Supplement: b811322j.pdf [file b811322j.pdf]

Electronic Supplementary Material for CrystEngComm  
 This journal is (c) The Royal Society of Chemistry 2008

|                            | <b>A1</b>                                                                                  | <b>A2</b>                                                                                                 | <b>A3</b>                                                                                                 | <b>B5</b>                                                                                                           | <b>C6</b>                                                                                                            | <b>D7</b>                                                                                              |
|----------------------------|--------------------------------------------------------------------------------------------|-----------------------------------------------------------------------------------------------------------|-----------------------------------------------------------------------------------------------------------|---------------------------------------------------------------------------------------------------------------------|----------------------------------------------------------------------------------------------------------------------|--------------------------------------------------------------------------------------------------------|
| Formula moiety             | (C <sub>8</sub> H <sub>5</sub> BrN <sub>2</sub> O)<br>(C <sub>6</sub> H <sub>6</sub> BrNO) | (C <sub>8</sub> H <sub>5</sub> BrN <sub>2</sub> O)<br>(C <sub>15</sub> H <sub>13</sub> BrN <sub>2</sub> ) | (C <sub>8</sub> H <sub>5</sub> BrN <sub>2</sub> O)<br>(C <sub>14</sub> H <sub>11</sub> BrN <sub>2</sub> ) | (C <sub>8</sub> H <sub>5</sub> N <sub>2</sub> OF) <sub>2</sub><br>(C <sub>12</sub> H <sub>10</sub> N <sub>2</sub> ) | (C <sub>22</sub> H <sub>18</sub> N <sub>4</sub> )<br>(C <sub>8</sub> H <sub>5</sub> N <sub>2</sub> OCl) <sub>2</sub> | (C <sub>15</sub> H <sub>15</sub> N <sub>3</sub> )<br>(C <sub>8</sub> H <sub>5</sub> N <sub>2</sub> OF) |
| Empirical formula          | C <sub>14</sub> H <sub>11</sub> Br <sub>2</sub> N <sub>3</sub> O <sub>2</sub>              | C <sub>23</sub> H <sub>18</sub> Br <sub>2</sub> N <sub>4</sub> O                                          | C <sub>22</sub> H <sub>16</sub> Br <sub>2</sub> N <sub>4</sub> O                                          | C <sub>28</sub> H <sub>20</sub> F <sub>2</sub> N <sub>6</sub> O <sub>2</sub>                                        | C <sub>38</sub> H <sub>28</sub> Cl <sub>2</sub> N <sub>8</sub> O <sub>2</sub>                                        | C <sub>23</sub> H <sub>20</sub> FN <sub>5</sub> O                                                      |
| Molecular weight           | 413.08                                                                                     | 526.23                                                                                                    | 512.21                                                                                                    | 510.50                                                                                                              | 699.58                                                                                                               | 401.44                                                                                                 |
| Color, Habit               | colorless prism                                                                            | colorless needle                                                                                          | colorless block                                                                                           | colorless plate                                                                                                     | colourless plate                                                                                                     | colourless plate                                                                                       |
| Crystal size, mm           | 0.35 x 0.30 x 0.15                                                                         | 0.40 x 0.12 x 0.66                                                                                        | 0.48 x 0.30 x 0.18                                                                                        | 0.40 x 0.20 x 0.08                                                                                                  | 0.30 x 0.30 x 0.15                                                                                                   | 0.30 x 0.15 x 0.05                                                                                     |
| Crystal system             | Triclinic                                                                                  | Monoclinic                                                                                                | Triclinic                                                                                                 | Triclinic                                                                                                           | Monoclinic                                                                                                           | Monoclinic                                                                                             |
| Space group, Z             | P-1, 2                                                                                     | P2 <sub>1</sub> /c, 4                                                                                     | P-1, 2                                                                                                    | P-1, 1                                                                                                              | P2 <sub>1</sub> /n, 2                                                                                                | P2 <sub>1</sub> /n, 4                                                                                  |
| a, Å                       | 6.9907(6)                                                                                  | 4.9374(6)                                                                                                 | 5.3033(6)                                                                                                 | 3.8189(6)                                                                                                           | 13.6335(10)                                                                                                          | 16.1659(12)                                                                                            |
| b, Å                       | 8.0552(7)                                                                                  | 22.597(3)                                                                                                 | 13.2294(15)                                                                                               | 11.2941(18)                                                                                                         | 4.4402(3)                                                                                                            | 6.4146(5)                                                                                              |
| c, Å                       | 15.3027(13)                                                                                | 19.233(2)                                                                                                 | 15.0601(17)                                                                                               | 14.107(2)                                                                                                           | 27.297(2)                                                                                                            | 21.0074(16)                                                                                            |
| α, °                       | 79.305(5)                                                                                  |                                                                                                           | 102.536(2)                                                                                                | 98.884(10)                                                                                                          |                                                                                                                      |                                                                                                        |
| β, °                       | 89.038(5)                                                                                  | 96.869(2)                                                                                                 | 99.505(2)                                                                                                 | 93.147(11)                                                                                                          | 94.084(3)                                                                                                            | 105.945(5)                                                                                             |
| γ, °                       | 64.660(5)                                                                                  |                                                                                                           | 94.752(2)                                                                                                 | 94.624(10)                                                                                                          |                                                                                                                      |                                                                                                        |
| Volume, Å <sup>3</sup>     | 763.37(11)                                                                                 | 2130.5(4)                                                                                                 | 1009.5(2)                                                                                                 | 597.79(16)                                                                                                          | 1648.2(2)                                                                                                            | 2094.6(3)                                                                                              |
| Density, g/cm <sup>3</sup> | 1.797                                                                                      | 1.641                                                                                                     | 1.685                                                                                                     | 1.418                                                                                                               | 1.410                                                                                                                | 1.273                                                                                                  |
| Temperature, K             | 173(2)                                                                                     | 100(2)                                                                                                    | 100(2)                                                                                                    | 173(2)                                                                                                              | 120(2)                                                                                                               | 120(2)                                                                                                 |
| X-ray wavelength           | 0.71073                                                                                    | 0.71073                                                                                                   | 0.71073                                                                                                   | 0.71073                                                                                                             | 0.71073                                                                                                              | 0.71073                                                                                                |
| θ <sub>min</sub> , °       | 1.4                                                                                        | 2.3                                                                                                       | 2.8                                                                                                       | 1.5                                                                                                                 | 1.6                                                                                                                  | 1.4                                                                                                    |
| θ <sub>max</sub> , °       | 27.9                                                                                       | 30.0                                                                                                      | 30.1                                                                                                      | 27.5                                                                                                                | 31.0                                                                                                                 | 30.5                                                                                                   |
| Reflections                |                                                                                            |                                                                                                           |                                                                                                           |                                                                                                                     |                                                                                                                      |                                                                                                        |
| collected                  | 5513                                                                                       | 24200                                                                                                     | 11582                                                                                                     | 4295                                                                                                                | 40395                                                                                                                | 20522                                                                                                  |
| independent                | 3350                                                                                       | 6170                                                                                                      | 5763                                                                                                      | 2606                                                                                                                | 5259                                                                                                                 | 6367                                                                                                   |
| observed                   | 2663                                                                                       | 4792                                                                                                      | 4972                                                                                                      | 1734                                                                                                                | 3883                                                                                                                 | 2616                                                                                                   |
| Abs. correction            | multi-scan                                                                                 | multi-scan                                                                                                | multi-scan                                                                                                | none                                                                                                                | none                                                                                                                 | none                                                                                                   |
| μ, mm <sup>-1</sup>        | 5.316                                                                                      | 3.828                                                                                                     | 4.036                                                                                                     | 0.104                                                                                                               | 0.247                                                                                                                | 0.088                                                                                                  |
| Threshold expression       | >2σ(I)                                                                                     | >2σ(I)                                                                                                    | >2σ(I)                                                                                                    | >2σ(I)                                                                                                              | >2σ(I)                                                                                                               | >2σ(I)                                                                                                 |
| R <sub>1</sub> (observed)  | 0.058                                                                                      | 0.034                                                                                                     | 0.027                                                                                                     | 0.060                                                                                                               | 0.042                                                                                                                | 0.053                                                                                                  |
| wR <sub>2</sub> (all)      | 0.170                                                                                      | 0.089                                                                                                     | 0.074                                                                                                     | 0.175                                                                                                               | 0.112                                                                                                                | 0.132                                                                                                  |

### X-ray experimental information

X-ray data were collected on a Bruker SMART 1000 four-circle CCD diffractometer at 173 K (**A1**, **B4**), SMART APEX CCD diffractometer at 100 K (**A2** and **A3**), or Kappa APEXII CCD diffractometer at 120 K (**C5** and **D6**) using, in each case, a fine-focus molybdenum  $K\alpha$  tube. Data were collected using SMART (**A1**, **B5**)<sup>(a)</sup> or APEX2 (**A2**, **A3**, **C6** and **D7**)<sup>(b)</sup> software. Initial cell constants were found by small widely separated “matrix” runs. Generally, an entire hemisphere of reciprocal space was collected regardless of Laué symmetry. Scan speed and scan width were chosen based on scattering power and peak rocking curves.

Unit cell constants and orientation matrix were improved by least-squares refinement of reflections thresholded from the entire dataset. Integration was performed with SAINT,<sup>(c)</sup> using this improved unit cell as a starting point. Precise unit cell constants were calculated in SAINT from the final merged dataset. Lorentz and polarization corrections were applied. Laué symmetry, space group, and unit cell contents were found with XPREP.

Data were reduced with SHELXTL.<sup>(d)</sup> The structures were solved in all cases by direct methods without incident. None of the crystals contained solvent or water of hydration, and the only structure showing disorder was **B5**, whose 2-fluoro substituent was disordered over both ortho sites. Except for the oxime hydrogen atoms, whose coordinates were allowed to refine, hydrogen atoms were assigned to idealized positions and were allowed to ride. Where possible, the coordinates of the amide hydrogen atoms were allowed to refine. Heavy atoms were refined with anisotropic displacement parameters. Datasets for the samples containing bromine (**A1**, **A2** and **A3**) were corrected for absorption.

(a) SMART v5.060, © 1997 - 1999, Bruker Analytical X-ray Systems, Madison, WI.

(b) APEX2 v2.2.0 © 2005 - 2007, Bruker AXS, Madison, WI.

(c) SAINT v7.46a, © 1997 - 2007, Bruker AXS, Madison, WI.

(d) SHELXTL v6.10, © 2001, Bruker AXS, Madison, WI.
